# Supplementary material for: Kin Recognition in a Clonal Fish, Poecilia formosa
Source: PubMed Central journal article supplement (PMC4970819; doi:10.1371/journal.pone.0158442), 2016-08-02

S5 Figure

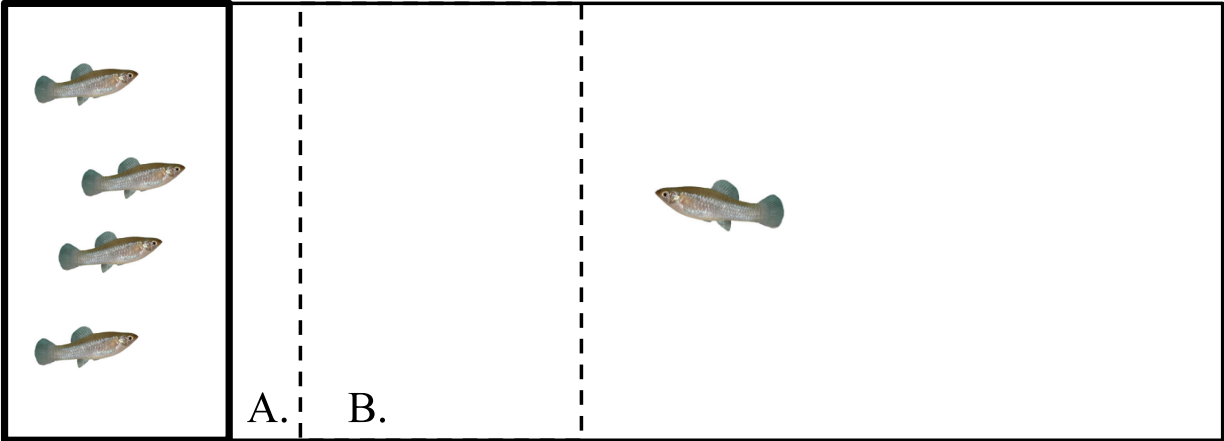

Supplement: pone.0158442.s005.pdf [file pone.0158442.s005.pdf]
