# Supplementary material for: Kin Recognition in a Clonal Fish, Poecilia formosa
Source: PubMed Central journal article supplement (PMC4970819; doi:10.1371/journal.pone.0158442), 2016-08-02
Supplement: pone.0158442.s012.pdf [file pone.0158442.s012.pdf]

**S1 Table.**

| Tested Population                          | Location   | Drainage Basin   | Coordinates |             |
|--------------------------------------------|------------|------------------|-------------|-------------|
|                                            |            |                  | North       | West        |
| San Marcos (C101)                          | Texas, USA | Guadalupe River  | 29°51'25.83 | 97°53'47.96 |
| Comal Spring                               | Texas, USA | Guadalupe River  | 29°42'46.82 | 98°8'8.25   |
| Weslaco                                    | Texas, USA | Río Grande       | 26°7'14.52  | 97°57'41.44 |
| Río Purificación,<br>Barretal (III/9)      | Mexico     | Río Pánuco       | 24°4'42.85  | 99°7'21.76  |
| Río Purificación,<br>Nuevo Padilla (VI/17) | Mexico     | Río Pánuco       | 24°02'35.59 | 98°54'15.98 |
| San Ignacio                                | Mexico     | Río San Fernando | 24°51'53.2  | 99°20'02.7  |
