# Supplementary material for: Kin Recognition in a Clonal Fish, Poecilia formosa
Source: PubMed Central journal article supplement (PMC4970819; doi:10.1371/journal.pone.0158442), 2016-08-02
Supplement: pone.0158442.s013.pdf [file pone.0158442.s013.pdf]

S2 Table.

| Locus                                  | Characteristics in <i>Poecilia formosa</i> |          |            |             |       |       |          |          |
|----------------------------------------|--------------------------------------------|----------|------------|-------------|-------|-------|----------|----------|
|                                        | Population                                 | <i>n</i> | Allele No. | Allele size | $H_O$ | $H_E$ | <i>P</i> | $F_{ST}$ |
| <b>GA-II41</b><br>Genbank#<br>AJ810469 | Co101                                      | 5        | 2          | 118 - 126   | 0.800 | 0.533 | 0.429    | 0.083    |
|                                        | 3VI/17                                     | 11       | 2          | 118 - 126   | 1.000 | 0.524 | 0.003    |          |
|                                        | 4III/9                                     | 12       | 2          | 118 - 126   | 1.000 | 0.522 | 0.002    |          |
|                                        | W5-Weslaco                                 | 7        | 2          | 118 - 126   | 1.000 | 0.538 | 0.037    |          |
|                                        | 6SI-SanIgnacio                             | 5        | 2          | 118 - 126   | 1.000 | 0.556 | 0.126    |          |
|                                        | 7aCS-7aComalSpring                         | 11       | 2          | 118 - 126   | 1.000 | 0.524 | 0.003    |          |
|                                        | 8bCS-8bComalSpring                         | 11       | 2          | 118 - 126   | 1.000 | 0.524 | 0.003    |          |
| <b>GA-I47A</b><br>Genbank#<br>AJ810468 | Co101                                      | 4        | 2          | 133 - 155   | 1.000 | 0.571 | 0.314    | 0.240    |
|                                        | 3VI/17                                     | 11       | 2          | 133 - 155   | 1.000 | 0.524 | 0.003    |          |
|                                        | 4III/9                                     | 12       | 2          | 133 - 155   | 1.000 | 0.522 | 0.002    |          |
|                                        | W5-Weslaco                                 | 7        | 2          | 133 - 159   | 1.000 | 0.538 | 0.037    |          |
|                                        | 6SI-SanIgnacio                             | 5        | 2          | 133 - 155   | 1.000 | 0.556 | 0.128    |          |
|                                        | 7aCS-7aComalSpring                         | 11       | 2          | 133 - 155   | 1.000 | 0.524 | 0.003    |          |
|                                        | 8bCS-8bComalSpring                         | 11       | 2          | 133 - 155   | 1.000 | 0.524 | 0.003    |          |
| <b>GT-II33</b><br>Genbank#<br>AJ810474 | Co101                                      | 5        | 2          | 178 - 182   | 0.800 | 0.533 | 0.429    | 0.397    |
|                                        | 3VI/17                                     | 11       | 1          | 182         | 0.000 | 0.000 | -        |          |
|                                        | 4III/9                                     | 12       | 1          | 182         | 0.000 | 0.000 | -        |          |
|                                        | W5-Weslaco                                 | 7        | 1          | 182         | 0.000 | 0.000 | -        |          |
|                                        | 6SI-SanIgnacio                             | 5        | 1          | 182         | 0.000 | 0.000 | -        |          |
|                                        | 7aCS-7aComalSpring                         | 11       | 1          | 182         | 0.000 | 0.000 | -        |          |
|                                        | 8bCS-8bComalSpring                         | 11       | 2          | 178 - 182   | 1.000 | 0.524 | 0.003    |          |
| <b>GA-V18</b><br>Genbank#<br>AJ810470  | Co101                                      | 5        | 3          | 122 - 148   | 1.000 | 0.644 | 0.176    | 0.221    |
|                                        | 3VI/17                                     | 11       | 2          | 122 - 148   | 1.000 | 0.524 | 0.003    |          |
|                                        | 4III/9                                     | 12       | 2          | 122 - 148   | 1.000 | 0.522 | 0.002    |          |
|                                        | W5-Weslaco                                 | 7        | 2          | 122 - 148   | 1.000 | 0.538 | 0.037    |          |
|                                        | 6SI-SanIgnacio                             | 5        | 2          | 122 - 144   | 1.000 | 0.556 | 0.127    |          |
|                                        | 7aCS-7aComalSpring                         | 11       | 2          | 122 - 144   | 1.000 | 0.524 | 0.003    |          |
|                                        | 8bCS-8bComalSpring                         | 11       | 3          | 122 - 148   | 1.000 | 0.602 | 0.006    |          |
| <b>GA-I26</b><br>Genbank#<br>AJ810456  | Co101                                      | 4        | 2          | 160 - 194   | 1.000 | 0.571 | 0.314    | 0.201    |
|                                        | 3VI/17                                     | 11       | 2          | 160 - 194   | 1.000 | 0.524 | 0.003    |          |
|                                        | 4III/9                                     | 12       | 2          | 160 - 194   | 1.000 | 0.522 | 0.002    |          |
|                                        | W5-Weslaco                                 | 7        | 2          | 160 - 194   | 1.000 | 0.538 | 0.038    |          |
|                                        | 6SI-SanIgnacio                             | 5        | 2          | 160 - 194   | 1.000 | 0.556 | 0.126    |          |
|                                        | 7aCS-7aComalSpring                         | 11       | 2          | 160 - 194   | 1.000 | 0.524 | 0.003    |          |
|                                        | 8bCS-8bComalSpring                         | 11       | 2          | 160 - 194   | 1.000 | 0.524 | 0.003    |          |

|                                                 |                    |    |   |           |       |       |       |       |
|-------------------------------------------------|--------------------|----|---|-----------|-------|-------|-------|-------|
| <b>GA-III28</b><br><b>Genbank#</b><br>AJ810459  | Co101              | 4  | 2 | 215 - 241 | 1.000 | 0.571 | 0.315 | 0.303 |
|                                                 | 3VI/17             | 11 | 2 | 215 - 241 | 1.000 | 0.524 | 0.003 |       |
|                                                 | 4III/9             | 12 | 2 | 215 - 241 | 1.000 | 0.522 | 0.002 |       |
|                                                 | W5-Weslaco         | 7  | 2 | 237 - 241 | 1.000 | 0.538 | 0.038 |       |
|                                                 | 6SI-SanIgnacio     | 5  | 2 | 215 - 241 | 1.000 | 0.556 | 0.126 |       |
|                                                 | 7aCS-7aComalSpring | 11 | 2 | 215 - 241 | 1.000 | 0.524 | 0.003 |       |
|                                                 | 8bCS-8bComalSpring | 11 | 2 | 215 - 241 | 1.000 | 0.524 | 0.003 |       |
| <b>GA-III29B</b><br><b>Genbank#</b><br>AJ810460 | Co101              | 5  | 2 | 255 - 257 | 0.000 | 0.356 | 0.111 | 0.889 |
|                                                 | 3VI/17             | 11 | 2 | 255 - 265 | 0.000 | 0.173 | 0.047 |       |
|                                                 | 4III/9             | 12 | 1 | 255       | 0.083 | 0.083 | 1.000 |       |
|                                                 | W5-Weslaco         | 7  | 1 | 261       | 0.000 | 0.000 | -     |       |
|                                                 | 6SI-SanIgnacio     | 5  | 1 | 257       | 0.000 | 0.000 | -     |       |
|                                                 | 7aCS-7aComalSpring | 11 | 1 | 257       | 0.000 | 0.000 | -     |       |
|                                                 | 8bCS-8bComalSpring | 11 | 1 | 257       | 0.000 | 0.000 | -     |       |
| <b>GT-I41</b><br><b>Genbank#</b><br>AJ810472    | Co101              | 5  | 1 | 148       | 0.000 | 0.000 | -     | -     |
|                                                 | 3VI/17             | 11 | 1 | 148       | 0.000 | 0.000 | -     |       |
|                                                 | 4III/9             | 12 | 1 | 148       | 0.000 | 0.000 | -     |       |
|                                                 | W5-Weslaco         | 7  | 1 | 148       | 0.000 | 0.000 | -     |       |
|                                                 | 6SI-SanIgnacio     | 5  | 1 | 148       | 0.000 | 0.000 | -     |       |
|                                                 | 7aCS-7aComalSpring | 11 | 1 | 148       | 0.000 | 0.000 | -     |       |
|                                                 | 8bCS-8bComalSpring | 11 | 1 | 148       | 0.000 | 0.000 | -     |       |
| <b>GA-IV42</b><br><b>Genbank#</b><br>AJ810462   | Co101              | 5  | 3 | 198 - 204 | 1.000 | 0.644 | 0.175 | 0.316 |
|                                                 | 3VI/17             | 11 | 2 | 198 - 202 | 1.000 | 0.524 | 0.003 |       |
|                                                 | 4III/9             | 12 | 2 | 198 - 202 | 1.000 | 0.522 | 0.002 |       |
|                                                 | W5-Weslaco         | 7  | 2 | 198 - 202 | 1.000 | 0.538 | 0.038 |       |
|                                                 | 6SI-SanIgnacio     | 5  | 2 | 198 - 204 | 1.000 | 0.556 | 0.127 |       |
|                                                 | 7aCS-7aComalSpring | 11 | 2 | 198 - 204 | 1.000 | 0.524 | 0.003 |       |
|                                                 | 8bCS-8bComalSpring | 11 | 2 | 198 - 204 | 1.000 | 0.524 | 0.003 |       |
| <b>GA-I29B</b><br><b>Genbank#</b><br>AJ810458   | Co101              | 4  | 2 | 229 - 255 | 1.000 | 0.571 | 0.314 | 0.228 |
|                                                 | 3VI/17             | 11 | 2 | 229 - 255 | 1.000 | 0.524 | 0.003 |       |
|                                                 | 4III/9             | 12 | 2 | 229 - 255 | 1.000 | 0.522 | 0.002 |       |
|                                                 | W5-Weslaco         | 7  | 2 | 229 - 257 | 1.000 | 0.538 | 0.037 |       |
|                                                 | 6SI-SanIgnacio     | 5  | 2 | 229 - 255 | 1.000 | 0.556 | 0.127 |       |
|                                                 | 7aCS-7aComalSpring | 11 | 2 | 229 - 255 | 1.000 | 0.524 | 0.003 |       |
|                                                 | 8bCS-8bComalSpring | 11 | 2 | 229 - 255 | 1.000 | 0.524 | 0.003 |       |
| <b>GT-II49</b><br><b>Genbank#</b><br>AJ810466   | Co101              | 5  | 2 | 342 - 382 | 1.000 | 0.556 | 0.128 | 0.219 |
|                                                 | 3VI/17             | 11 | 2 | 342 - 382 | 1.000 | 0.524 | 0.003 |       |
|                                                 | 4III/9             | 12 | 2 | 342 - 382 | 1.000 | 0.522 | 0.002 |       |
|                                                 | W5-Weslaco         | 7  | 2 | 342 - 382 | 1.000 | 0.538 | 0.037 |       |
|                                                 | 6SI-SanIgnacio     | 5  | 2 | 342 - 382 | 1.000 | 0.556 | 0.126 |       |

|                          |                    |    |   |           |       |       |       |       |
|--------------------------|--------------------|----|---|-----------|-------|-------|-------|-------|
|                          | 7aCS-7aComalSpring | 11 | 2 | 342 - 382 | 1.000 | 0.524 | 0.003 |       |
|                          | 8bCS-8bComalSpring | 11 | 2 | 342 - 382 | 1.000 | 0.524 | 0.003 |       |
| <b>GA-III49A<br/>NEU</b> | Co101              | 5  | 3 | 394 - 412 | 1.000 | 0.644 | 0.174 | 0.181 |
| <b>Genbank#</b>          | 3VI/17             | 11 | 2 | 394 - 408 | 1.000 | 0.524 | 0.003 |       |
| <b>AJ810461</b>          | 4III/9             | 12 | 2 | 394 - 408 | 0.917 | 0.518 | 0.014 |       |
|                          | W5-Weslaco         | 7  | 2 | 394 - 414 | 1.000 | 0.538 | 0.037 |       |
|                          | 6SI-SanIgnacio     | 5  | 2 | 394 - 408 | 1.000 | 0.556 | 0.127 |       |
|                          | 7aCS-7aComalSpring | 11 | 2 | 394 - 408 | 1.000 | 0.524 | 0.003 |       |
|                          | 8bCS-8bComalSpring | 11 | 2 | 394 - 408 | 1.000 | 0.524 | 0.003 |       |
