# Supplementary material for: Kin Recognition in a Clonal Fish, Poecilia formosa
Source: PubMed Central journal article supplement (PMC4970819; doi:10.1371/journal.pone.0158442), 2016-08-02
Supplement: pone.0158442.s015.pdf [file pone.0158442.s015.pdf]

**S4 Table.**

|                 | C101 | VI/17 | III/9 | Weslaco | San Ignacio | Comal Spring 7a | Comal Spring 8b |
|-----------------|------|-------|-------|---------|-------------|-----------------|-----------------|
| C101            | -    | 654.1 | 653.9 | 415.5   | 573         | 28.1            | 28.1            |
| VI/17           | 6    | -     | 22.51 | 249.8   | 100.4       | 635             | 635             |
| III/9           | 6    | 1     | -     | 255.4   | 90          | 634.1           | 634.1           |
| Weslaco         | 8    | 6     | 6     | -       | 196.2       | 399.8           | 399.8           |
| San Ignacio     | 4    | 4     | 4     | 6       | -           | 552.8           | 552.8           |
| Comal Spring 7a | 4    | 4     | 4     | 6       | 0           | -               | 0               |
| Comal Spring 8b | 3    | 5     | 5     | 7       | 2           | 2               | -               |
