# Supplementary material for: Kin Recognition in a Clonal Fish, Poecilia formosa
Source: PubMed Central journal article supplement (PMC4970819; doi:10.1371/journal.pone.0158442), 2016-08-02
Supplement: pone.0158442.s016.pdf [file pone.0158442.s016.pdf]

**S5 Table.**

|                 | C101  | VI/17 | III/9 | Weslaco | San Ignacio | Comal Spring 7a | Comal Spring 8b |
|-----------------|-------|-------|-------|---------|-------------|-----------------|-----------------|
| C101            | 0.825 | 0.772 | 0.772 | 0.650   | 0.892       | 0.892           | 0.906           |
| VI/17           |       | 0.992 | 0.989 | 0.750   | 0.791       | 0.791           | 0.750           |
| III/9           |       |       | 0.997 | 0.708   | 0.788       | 0.788           | 0.747           |
| Weslaco         |       |       |       | 1.000   | 0.667       | 0.667           | 0.625           |
| San Ignacio     |       |       |       |         | 1.000       | 1.000           | 0.951           |
| Comal Spring 7a |       |       |       |         |             | 1.000           | 0.951           |
| Comal Spring 8b |       |       |       |         |             |                 | 0.986           |
