# Supplementary material for: Kin Recognition in a Clonal Fish, Poecilia formosa
Source: PubMed Central journal article supplement (PMC4970819; doi:10.1371/journal.pone.0158442), 2016-08-02
Supplement: pone.0158442.s017.pdf [file pone.0158442.s017.pdf]

**S6 Table.**

|                 | C101  | VI/17  | III/9  | Weslaco | San Ignacio | Comal Spring 7a | Comal Spring 8b |
|-----------------|-------|--------|--------|---------|-------------|-----------------|-----------------|
| C101            | 0.115 | -0.153 | -0.153 | -0.77   | 0.454       | 0.454           | 0.525           |
| VI/17           |       | 0.960  | 0.944  | -0.264  | -0.057      | -0.057          | -0.264          |
| III/9           |       |        | 0.985  | -0.477  | -0.072      | -0.072          | -0.279          |
| Weslaco         |       |        |        | 1.000   | -0.684      | -0.684          | -0.896          |
| San Ignacio     |       |        |        |         | 1.000       | 1.000           | 0.752           |
| Comal Spring 7a |       |        |        |         |             | 1.000           | 0.752           |
| Comal Spring 8b |       |        |        |         |             |                 | 0.929           |
